# Supplementary material
Source: publisher site journal article supplement (https://www.dovepress.com/article/555182)
Supplement: Supplementary file 1 [file 555182%20Revised%20Supplementary%20Material.pdf]

**Supp. Fig. 1.**

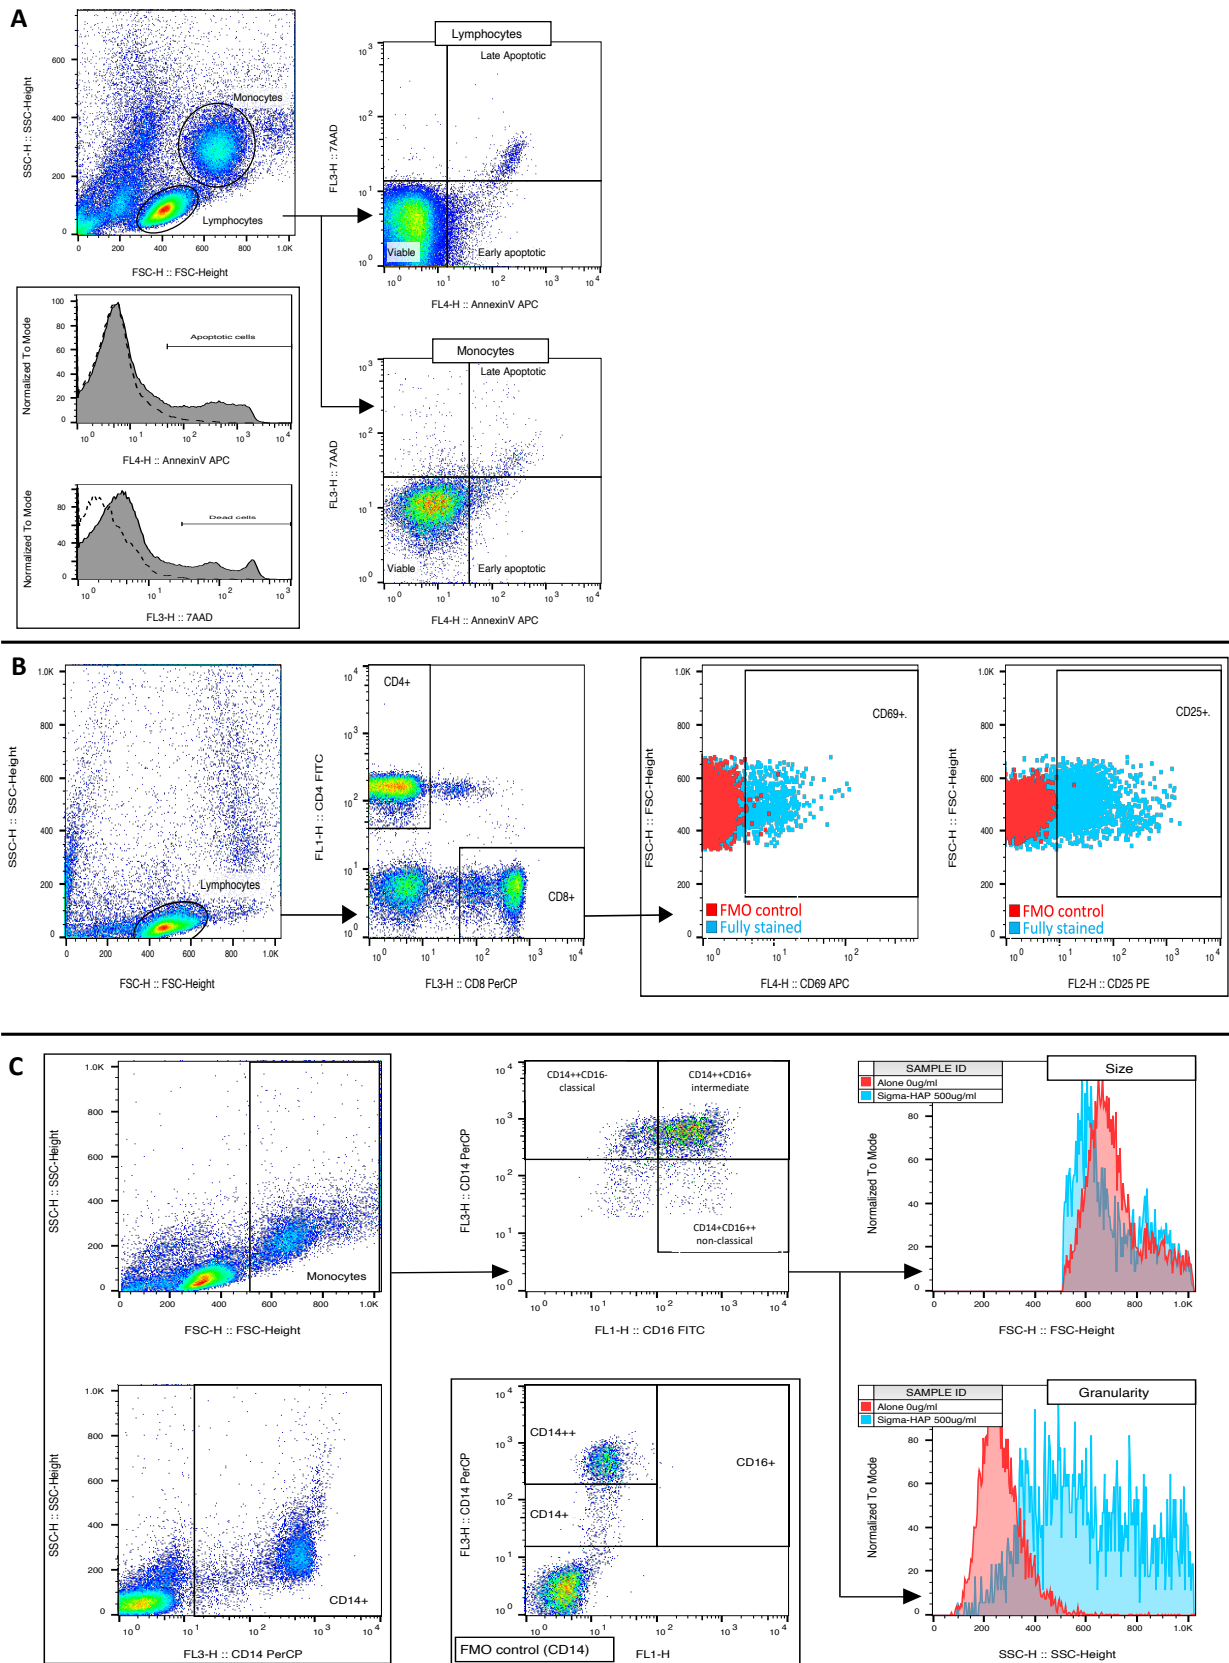

**Supp. Fig. 1.** Gating strategy for determination of viable, early and late apoptotic lymphocytes and monocytes (dashed lines indicating FMO controls) (A). Gating strategy for evaluation of CD4<sup>+</sup> and CD8<sup>+</sup> lymphocytes, and expression patterns of CD69 and CD25 in in those subsets, with FMO controls demonstrated (B). Gating strategy used for delineation of three monocyte subpopulations, and determination of relative size and granularity (FSC and SSC properties respectively). Negative and FMO control used for establishing proper gating on CD14-positive and CD16-positive monocytes; with sample differences in size and granularity of the treated monocytes (C).

**Supp. Fig. 2.**

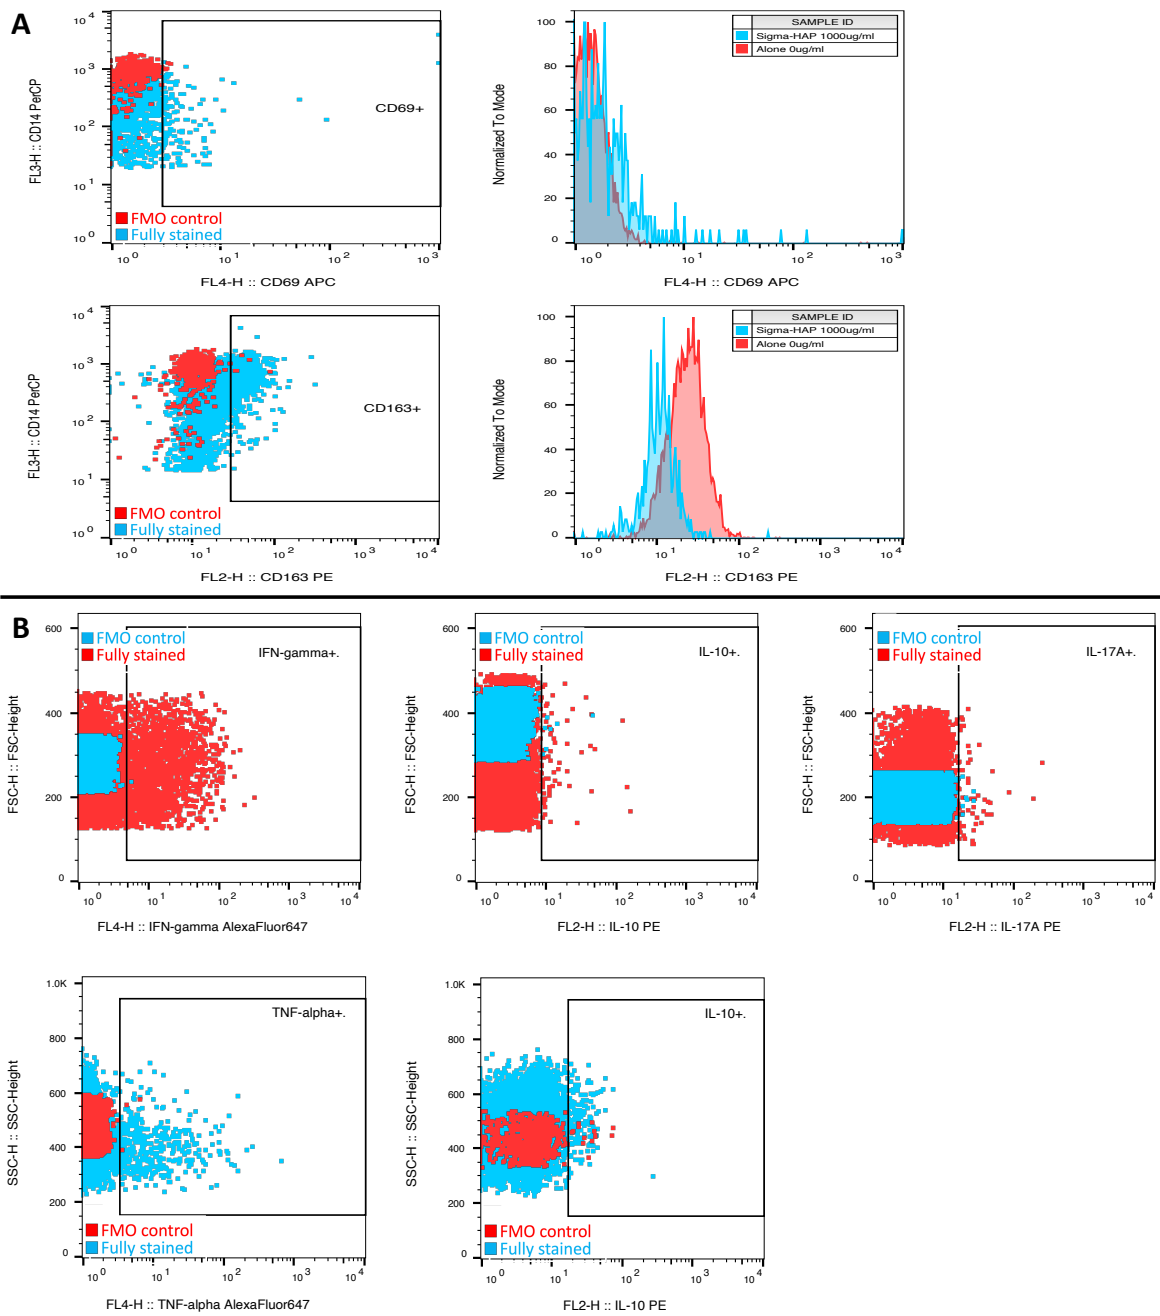

**Supp. Fig. 2.** Additional gating strategy for evaluation of expression patterns of CD69 and CD163 in monocytes; FMO controls demonstrated, with sample changes in selected markers (A). Assessment of cytokines released into the culture medium by monocytes and lymphocytes incubated in presence of hydroxyapatite nanoparticles (B).
